# Supplementary material for: Machine Learning Prediction of Incident Hypertension Using Baseline Biomarkers: Evidence from the CHARLS Cohort
Source: Research Square preprint supplement (doi:10.21203/rs.3.rs-6824239/v1), 2025-06-23
Supplement: Supplementary file 1 [file 3c1b7363ed1e2ffa82c25f27.docx]

***Supplementary Table 1: Univariate Cox Proportional Hazards Regression Analysis of Factors Associated with Outcome of Interest***

| **Variable Description** | **HR** | **Std. Error** | **z value** | **P-value** | **95% CI Lower** | **95% CI Upper** |
| --- | --- | --- | --- | --- | --- | --- |
| Age (years) | 1.032 | 0.002 | 13.19 | <0.001 | 1.028 | 1.037 |
| Gender: Male vs Female | 1.093 | 0.046 | 1.92 | 0.055 | 0.998 | 1.198 |
| Residency: Rural vs Urban | 1.129 | 0.05 | 2.44 | 0.015 | 1.024 | 1.245 |
| CESD-10 Score | 1.01 | 0.004 | 2.64 | 0.008 | 1.002 | 1.017 |
| Systolic Blood Pressure (mmHg) | 1.042 | 0.002 | 19.17 | <0.001 | 1.037 | 1.046 |
| Diastolic Blood Pressure (mmHg) | 1.03 | 0.003 | 10.94 | <0.001 | 1.024 | 1.035 |
| Fasting Blood Glucose | 1.004 | 0.001 | 6.26 | <0.001 | 1.002 | 1.005 |
| Total Cholesterol | 1.002 | 0.001 | 3.62 | <0.001 | 1.001 | 1.003 |
| Triglycerides | 1.001 | 0 | 3.58 | <0.001 | 1 | 1.001 |
| C-Reactive Protein (CRP) | 1.009 | 0.003 | 2.83 | 0.005 | 1.003 | 1.015 |
| Uric Acid | 1.104 | 0.019 | 5.19 | <0.001 | 1.063 | 1.145 |
| Cystatin C | 1.434 | 0.076 | 4.75 | <0.001 | 1.236 | 1.664 |
| Triglyceride-Glucose (TyG) Index | 1.263 | 0.034 | 6.82 | <0.001 | 1.181 | 1.351 |
| Body Mass Index (BMI, kg/m²) | 1.035 | 0.006 | 5.71 | <0.001 | 1.023 | 1.047 |
| Exercise: Yes vs No | 0.885 | 0.123 | -0.99 | 0.322 | 0.696 | 1.127 |
| Exercise: Unknown | 0.914 | 0.121 | -0.74 | 0.459 | 0.721 | 1.159 |
| Education: Middle/High School vs Primary or less | 0.862 | 0.059 | -2.49 | 0.013 | 0.768 | 0.969 |
| Education: College or Above vs Primary or less | 0.669 | 0.083 | -4.87 | <0.001 | 0.569 | 0.786 |
| Education: Unknown | 0 | 414.411 | -0.03 | 0.975 | 0 | N/A |
| Self-rated Health: Average vs Poor | 0.94 | 0.057 | -1.1 | 0.27 | 0.841 | 1.05 |
| Self-rated Health: Good/Excellent vs Poor | 1.002 | 0.066 | 0.04 | 0.97 | 0.881 | 1.141 |
| Self-rated Health: Unknown | 1.592 | 0.292 | 1.59 | 0.112 | 0.898 | 2.823 |
| Smoking Status: Yes vs No | 0.974 | 0.051 | -0.5 | 0.615 | 0.881 | 1.078 |
| Smoking Status: Unknown | 1.224 | 0.133 | 1.52 | 0.129 | 0.943 | 1.589 |
| Alcohol Consumption: Yes vs No | 1.018 | 0.049 | 0.37 | 0.711 | 0.925 | 1.121 |
| Alcohol Consumption: Unknown | 1.586 | 0.29 | 1.59 | 0.112 | 0.898 | 2.8 |
| Age (years) | 1.032 | 0.002 | 13.19 | <0.001 | 1.028 | 1.037 |

HR: Hazard Ratio. An HR > 1 indicates increased risk, HR ＜ l 1 indicates decreased risk. CI: Confidence Interval.

P-value: Probability value. P ≤ 0.05 was considered statistically significant.

Categorical variable reference groups are implied (e.g., for Gender: Male vs Female, Female is the reference).

Variable descriptions are standardized interpretations of the original variable codes.

Units for continuous variables (e.g., blood pressure, lab values) should be confirmed from study protocol.

***Supplementary*** ***Table 2: Multivariate Cox Proportional Hazards Regression Analysis of Factors Associated with*** ***Outcome of Interest***

| **Variable Description** | **HR** | **Std. Error** | **z value** | **P-value** | **95% CI Lower** | **95% CI Upper** |
| --- | --- | --- | --- | --- | --- | --- |
| Age (years) | 1.027 | 0.003 | 8.66 | <0.001 | 1.021 | 1.033 |
| Gender: Male vs Female | 1.068 | 0.067 | 0.98 | 0.325 | 0.937 | 1.218 |
| Residency: Rural vs Urban | 1.196 | 0.053 | 3.37 | <0.001 | 1.078 | 1.326 |
| CESD-10 Score | 1.01 | 0.004 | 2.51 | 0.012 | 1.002 | 1.018 |
| Systolic Blood Pressure (mmHg) | 1.035 | 0.003 | 11.7 | <0.001 | 1.029 | 1.041 |
| Diastolic Blood Pressure (mmHg) | 1.001 | 0.004 | 0.2 | 0.844 | 0.993 | 1.008 |
| Fasting Blood Glucose | 1 | 0.001 | 0.53 | 0.597 | 0.999 | 1.002 |
| Total Cholesterol | 1 | 0.001 | 0 | 0.999 | 0.999 | 1.001 |
| Triglycerides | 0.998 | 0.001 | -2.41 | 0.016 | 0.998 | 1 |
| C-Reactive Protein (CRP) | 1.007 | 0.003 | 2.06 | 0.04 | 1 | 1.014 |
| Uric Acid | 1.041 | 0.023 | 1.8 | 0.071 | 0.996 | 1.088 |
| Cystatin C | 0.911 | 0.117 | -0.79 | 0.428 | 0.724 | 1.147 |
| Triglyceride-Glucose (TyG) Index | 1.336 | 0.094 | 3.08 | 0.002 | 1.111 | 1.606 |
| Body Mass Index (BMI, kg/m²) | 1.033 | 0.007 | 4.94 | <0.001 | 1.02 | 1.046 |
| Exercise: Yes vs No | 0.95 | 0.124 | -0.42 | 0.678 | 0.744 | 1.212 |
| Exercise: Unknown | 0.985 | 0.122 | -0.12 | 0.903 | 0.775 | 1.252 |
| Education: Middle/High School vs Primary or less | 0.98 | 0.064 | -0.31 | 0.756 | 0.865 | 1.111 |
| Education: College or Above vs Primary or less | 0.81 | 0.087 | -2.55 | 0.011 | 0.674 | 0.95 |
| Education: Unknown | 0 | 392.27 | -0.03 | 0.974 | 0 | N/A |
| Self-rated Health: Average vs Poor | 1.01 | 0.06 | 0.16 | 0.874 | 0.898 | 1.135 |
| Self-rated Health: Good/Excellent vs Poor | 1.095 | 0.073 | 1.24 | 0.214 | 0.949 | 1.263 |
| Self-rated Health: Unknown | 4.448 | 0.886 | 1.69 | 0.092 | 0.784 | 25.234 |
| Smoking Status: Yes vs No | 0.939 | 0.064 | -0.99 | 0.322 | 0.829 | 1.064 |
| Smoking Status: Unknown | 1.203 | 0.156 | 1.19 | 0.236 | 0.886 | 1.633 |
| Alcohol Consumption: Yes vs No | 1.042 | 0.057 | 0.73 | 0.468 | 0.932 | 1.165 |
| Alcohol Consumption: Unknown | 0.453 | 0.894 | -0.89 | 0.375 | 0.078 | 2.612 |
| Age (years) | 1.027 | 0.003 | 8.66 | <0.001 | 1.021 | 1.033 |

HR: Hazard Ratio. An HR > 1 indicates increased risk, HR ＜ l 1 indicates decreased risk. CI: Confidence Interval.

P-value: Probability value. P ≤ 0.05 was considered statistically significant.

Categorical variable reference groups are implied (e.g., for Gender: Male vs Female, Female is the reference).

Variable descriptions are standardized interpretations of the original variable codes.

Units for continuous variables (e.g., blood pressure, lab values) should be confirmed from study protocol.
